# Supplementary material for: Risk factors for humanized IgG1 monoclonal antibody in the treatment of Crohn's disease: pharmacovigilance of the FDA adverse event reporting system (FAERS)
Source: Research Square preprint supplement (doi:10.21203/rs.3.rs-6189305/v1), 2025-03-12
Supplement: Supplementary file 1 [file 893f79d67e3fb882ae6fe55b.docx]

**Supplementary Data**

**Table S1 Calculation formula and Principle of dis-proportionality measure and standard of signal detection.**

| ROR |  | a≥3  95%CI＞1 |
| --- | --- | --- |
| PRR |  | a≥3  PRR≥2  χ2≥4 |

Abbreviations: ROR, Reporting odds ratio; PRR, Proportional Reporting Ratio; CI, Confidence Interval; IC, Information Component;χ2:chi-square test.

**Table S2 Signal strength of the preferred term (PT) and the clinical priority assessing results. (n > 10)**

|  | ustekinumab | | |  |  | risankizumab | | |
| --- | --- | --- | --- | --- | --- | --- | --- | --- |
| SOC | PT | n | ROR(95%Cl) | PRR(χ2) | PT | n | ROR(95%Cl) | PRR(χ2) |
| injury, poisoning and procedural complications | infusion related reaction | 489 | 2.81 ( 2.55 - 3.1 ) | 2.8 ( 475.86 ) | fall | 73 | 2.02 ( 1.59 - 2.56 ) | 2.01 ( 35.01 ) |
|  | injection related reaction | 29 | 24.91 ( 13.69 - 45.34 ) | 24.9 ( 245.87 ) | hip fracture | 15 | 4.35 ( 2.53 - 7.45 ) | 4.34 ( 34.03 ) |
|  | skin abrasion | 10 | 2.18 ( 1.12 - 4.23 ) | 2.18 ( 5.55 ) | scar | 14 | 3.11 ( 1.8 - 5.38 ) | 3.11 ( 18.28 ) |
|  | / | / | / | 2.38 ( 5.52 ) | skin laceration | 12 | 2.61 ( 1.45 - 4.7 ) | 2.61 ( 11.04 ) |
|  | / | / | / | 3.04 ( 5.67 ) | spinal fracture | 10 | 5.32 ( 2.72 - 10.38 ) | 5.31 ( 30.09 ) |
| gastrointestinal disorders | / | / | / | / |  | 220 | 3.75 ( 3.26 - 4.32 ) | 3.7 ( 391.83 ) |
|  | / | / | / | / | vomiting | 148 | 1.95 ( 1.65 - 2.3 ) | 1.94 ( 63.75 ) |
|  | / | / | / | / | frequent bowel movements | 86 | 1.39 ( 1.12 - 1.73 ) | 1.39 ( 8.95 ) |
|  | / | / | / | / | abdominal pain upper | 73 | 1.37 ( 1.08 - 1.73 ) | 1.37 ( 6.98 ) |
|  | / | / | / | / | abdominal distension | 71 | 1.4 ( 1.11 - 1.78 ) | 1.4 ( 7.86 ) |
|  | / | / | / | / | flatulence | 65 | 2.75 ( 2.13 - 3.54 ) | 2.74 ( 66.17 ) |
|  | / | / | / | / | gastrointestinal sounds abnormal | 60 | 8.72 ( 6.55 - 11.6 ) | 8.68 ( 321.91 ) |
|  | / | / | / | / | gastrointestinal disorder | 52 | 1.46 ( 1.11 - 1.93 ) | 1.46 ( 7.25 ) |
|  | / | / | / | / | small intestinal obstruction | 50 | 3.44 ( 2.57 - 4.6 ) | 3.43 ( 77.8 ) |
|  | / | / | / | / | intestinal stenosis | 30 | 1.83 ( 1.26 - 2.64 ) | 1.82 ( 10.6 ) |
|  | / | / | / | / | gastrointestinal inflammation | 27 | 1.61 ( 1.09 - 2.37 ) | 1.61 ( 5.89 ) |
|  | / | / | / | / | gastrointestinal haemorrhage | 22 | 5.54 ( 3.52 - 8.7 ) | 5.53 ( 69.73 ) |
| infections and infestations | pneumonia | 598 | 2.49 ( 2.28 - 2.72 ) | 2.47 ( 451.64 ) | clostridium difficile infection | 42 | 2.13 ( 1.56 - 2.91 ) | 2.12 ( 23.48 ) |
|  | lower respiratory tract infection | 487 | 8.22 ( 7.35 - 9.18 ) | 8.15 ( 1963.96 ) | sepsis | 39 | 2.85 ( 2.05 - 3.95 ) | 2.84 ( 42.82 ) |
|  | clostridium difficile infection | 273 | 2.7 ( 2.37 - 3.08 ) | 2.69 ( 246.07 ) | upper respiratory tract infection | 34 | 4.62 ( 3.23 - 6.62 ) | 4.61 ( 84.24 ) |
|  | anal abscess | 194 | 2.16 ( 1.86 - 2.51 ) | 2.16 ( 104.84 ) | postoperative wound infection | 17 | 3.26 ( 1.98 - 5.38 ) | 3.26 ( 24.22 ) |
|  | cellulitis | 139 | 2.55 ( 2.13 - 3.05 ) | 2.55 ( 111.21 ) | kidney infection | 15 | 2.01 ( 1.19 - 3.39 ) | 2.01 ( 7.16 ) |
|  | kidney infection | 129 | 4.38 ( 3.59 - 5.33 ) | 4.37 ( 258.09 ) | diverticulitis | 15 | 2.32 ( 1.37 - 3.91 ) | 2.32 ( 10.47 ) |
|  | abdominal abscess | 94 | 2.61 ( 2.09 - 3.25 ) | 2.6 ( 78.85 ) | abdominal abscess | 12 | 2.04 ( 1.14 - 3.65 ) | 2.04 ( 5.96 ) |
|  | gastrointestinal infection | 82 | 2.12 ( 1.68 - 2.67 ) | 2.11 ( 42.12 ) | appendicitis | 11 | 4.1 ( 2.19 - 7.68 ) | 4.1 ( 22.88 ) |
|  | tooth abscess | 81 | 3.86 ( 3.02 - 4.93 ) | 3.85 ( 135.35 ) | vascular device infection | 10 | 4.7 ( 2.42 - 9.13 ) | 4.7 ( 25.43 ) |
|  | postoperative wound infection | 80 | 2.72 ( 2.15 - 3.46 ) | 2.72 ( 73.5 ) | / | / | / | / |
|  | upper respiratory tract infection | 80 | 2.22 ( 1.75 - 2.81 ) | 2.22 ( 46.37 ) | / | / | / | / |
|  | rectal abscess | 78 | 2.53 ( 1.99 - 3.21 ) | 2.52 ( 61.26 ) | / | / | / | / |
|  | abscess intestinal | 76 | 2.02 ( 1.59 - 2.57 ) | 2.02 ( 34.44 ) | / | / | / | / |
|  | post procedural infection | 73 | 2.22 ( 1.73 - 2.84 ) | 2.22 ( 42.28 ) | / | / | / | / |
|  | respiratory tract infection | 72 | 4.33 ( 3.33 - 5.63 ) | 4.32 ( 142.03 ) | / | / | / | / |
|  | wound infection | 55 | 2.53 ( 1.9 - 3.36 ) | 2.52 ( 43.19 ) | / | / | / | / |
|  | infected fistula | 41 | 3.04 ( 2.17 - 4.26 ) | 3.04 ( 46.41 ) | / | / | / | / |
|  | device related infection | 37 | 2.84 ( 2 - 4.04 ) | 2.84 ( 37 ) | / | / | / | / |
|  | abscess limb | 37 | 2.52 ( 1.78 - 3.58 ) | 2.52 ( 29.03 ) | / | / | / | / |
|  | tonsillitis | 35 | 2.47 ( 1.73 - 3.53 ) | 2.47 ( 26.15 ) | / | / | / | / |
|  | appendicitis | 32 | 2 ( 1.38 - 2.89 ) | 2 ( 14 ) | / | / | / | / |
|  | peritonitis | 29 | 2.55 ( 1.72 - 3.78 ) | 2.55 ( 23.27 ) | / | / | / | / |
|  | pyelonephritis | 23 | 2.69 ( 1.72 - 4.19 ) | 2.69 ( 20.56 ) | / | / | / | / |
|  | escherichia infection | 23 | 2.64 ( 1.7 - 4.12 ) | 2.64 ( 19.9 ) | / | / | / | / |
|  | postoperative abscess | 21 | 2.32 ( 1.47 - 3.68 ) | 2.32 ( 13.64 ) | / | / | / | / |
|  | gastric infection | 21 | 2.43 ( 1.53 - 3.86 ) | 2.43 ( 15.19 ) | / | / | / | / |
|  | gastroenteritis norovirus | 20 | 11.23 ( 6.27 - 20.12 ) | 11.23 ( 105.33 ) | / | / | / | / |
|  | mastitis | 19 | 3.85 ( 2.32 - 6.39 ) | 3.85 ( 31.75 ) | / | / | / | / |
|  | groin abscess | 19 | 3.23 ( 1.96 - 5.3 ) | 3.22 ( 23.89 ) | / | / | / | / |
|  | abdominal infection | 18 | 2.92 ( 1.76 - 4.84 ) | 2.92 ( 18.93 ) | / | / | / | / |
|  | vascular device infection | 17 | 2.53 ( 1.51 - 4.24 ) | 2.53 ( 13.43 ) | / | / | / | / |
|  | perineal abscess | 17 | 4.14 ( 2.41 - 7.09 ) | 4.14 ( 31.5 ) | / | / | / | / |
|  | infected cyst | 17 | 3.4 ( 2.01 - 5.76 ) | 3.4 ( 23.35 ) | / | / | / | / |
|  | bacteraemia | 16 | 2.16 ( 1.28 - 3.66 ) | 2.16 ( 8.71 ) | / | / | / | / |
|  | perirectal abscess | 16 | 2.38 ( 1.4 - 4.04 ) | 2.38 ( 11.04 ) | / | / | / | / |
|  | pyoderma | 15 | 3.32 ( 1.89 - 5.81 ) | 3.32 ( 19.79 ) | / | / | / | / |
|  | salmonellosis | 15 | 2.52 ( 1.46 - 4.35 ) | 2.52 ( 11.7 ) | / | / | / | / |
|  | cholecystitis infective | 14 | 3.41 ( 1.9 - 6.1 ) | 3.41 ( 19.29 ) | / | / | / | / |
|  | abdominal wall abscess | 14 | 6.01 ( 3.23 - 11.2 ) | 6.01 ( 41.42 ) | / | / | / | / |
|  | stoma site infection | 13 | 2.5 ( 1.39 - 4.5 ) | 2.5 ( 9.96 ) | / | / | / | / |
|  | vulvovaginal mycotic infection | 12 | 2.47 ( 1.34 - 4.55 ) | 2.47 ( 8.96 ) | / | / | / | / |
|  | arthritis infective | 12 | 2.83 ( 1.52 - 5.24 ) | 2.83 ( 11.86 ) | / | / | / | / |
|  | lyme disease | 11 | 3.35 ( 1.74 - 6.44 ) | 3.35 ( 14.71 ) | / | / | / | / |
|  | meningitis | 11 | 2.2 ( 1.17 - 4.15 ) | 2.2 ( 6.25 ) | / | / | / | / |
|  | urosepsis | 11 | 2.43 ( 1.29 - 4.61 ) | 2.43 ( 7.96 ) | / | / | / | / |
|  | anal fistula infection | 10 | 2.32 ( 1.19 - 4.52 ) | 2.32 ( 6.46 ) | / | / | / | / |
|  | soft tissue infection | 10 | 9.73 ( 4.37 - 21.67 ) | 9.73 ( 47 ) | / | / | / | / |
|  | erysipelas | 10 | 3.74 ( 1.87 - 7.5 ) | 3.74 ( 16 ) | / | / | / | / |
| general disorders and administration site conditions | therapeutic response decreased | 302 | 7.62 ( 6.63 - 8.76 ) | 7.59 ( 1137.65 ) | fatigue | 368 | 2.06 ( 1.85 - 2.3 ) | 2.03 ( 184.36 ) |
|  | complication associated with device | 25 | 3.8 ( 2.45 - 5.91 ) | 3.8 ( 40.95 ) | injection site haemorrhage | 107 | 7.26 ( 5.89 - 8.96 ) | 7.21 ( 468.89 ) |
|  |  | / | / | / | feeling abnormal | 75 | 2.72 ( 2.15 - 3.45 ) | 2.71 ( 74.87 ) |
|  |  | / | / | / | injection site erythema | 47 | 3.57 ( 2.64 - 4.83 ) | 3.56 ( 78.03 ) |
|  |  | / | / | / | injection site papule | 39 | 10.65 ( 7.42 - 15.3 ) | 10.62 ( 256.16 ) |
|  |  | / | / | / | obstruction | 36 | 4.46 ( 3.15 - 6.33 ) | 4.45 ( 84.84 ) |
|  |  | / | / | / | injection site swelling | 34 | 3.99 ( 2.79 - 5.7 ) | 3.98 ( 67.58 ) |
|  |  | / | / | / | hernia | 32 | 2.4 ( 1.67 - 3.44 ) | 2.4 ( 24.25 ) |
|  |  | / | / | / | injection site reaction | 24 | 3.75 ( 2.45 - 5.72 ) | 3.74 ( 43.22 ) |
|  |  | / | / | / | injection site pruritus | 20 | 2.25 ( 1.43 - 3.53 ) | 2.24 ( 12.9 ) |
|  |  | / | / | / | swelling face | 18 | 2.45 ( 1.52 - 3.96 ) | 2.45 ( 14.39 ) |
|  |  | / | / | / | injection site urticaria | 18 | 6.15 ( 3.71 - 10.18 ) | 6.14 ( 65.16 ) |
|  |  | / | / | / | injection site mass | 16 | 8.8 ( 5.06 - 15.3 ) | 8.79 ( 86.92 ) |
| nervous system disorders | cerebrovascular accident | 100 | 2.09 ( 1.69 - 2.57 ) | 2.09 ( 49.47 ) | loss of consciousness | 53 | 3.97 ( 2.98 - 5.28 ) | 3.96 ( 104.56 ) |
|  | transient ischaemic attack | 33 | 2.45 ( 1.69 - 3.54 ) | 2.45 ( 24.15 ) | cerebrovascular accident | 35 | 3.52 ( 2.48 - 4.99 ) | 3.51 ( 56.8 ) |
|  | multiple sclerosis | 26 | 2.21 ( 1.46 - 3.33 ) | 2.21 ( 14.9 ) | seizure | 33 | 4.43 ( 3.08 - 6.37 ) | 4.42 ( 76.9 ) |
|  | facial paralysis | 24 | 3.85 ( 2.46 - 6.04 ) | 3.85 ( 40.07 ) | lethargy | 15 | 2.67 ( 1.58 - 4.53 ) | 2.67 ( 14.5 ) |
|  | posterior reversible encephalopathy syndrome | 23 | 12.44 ( 7.13 - 21.69 ) | 12.43 ( 130.6 ) | presyncope | 14 | 3.92 ( 2.25 - 6.82 ) | 3.91 ( 27.09 ) |
|  | cerebral haemorrhage | 14 | 2.65 ( 1.5 - 4.69 ) | 2.65 ( 12.21 ) | balance disorder | 12 | 2.37 ( 1.32 - 4.27 ) | 2.37 ( 8.88 ) |
|  | idiopathic intracranial hypertension | 11 | 8.03 ( 3.85 - 16.76 ) | 8.03 ( 43.67 ) | hypersomnia | 11 | 3.76 ( 2.01 - 7.01 ) | 3.75 ( 19.92 ) |
|  | ischaemic stroke | 11 | 2.59 ( 1.36 - 4.92 ) | 2.59 ( 9.12 ) | / | / | / | / |
|  | sensory disturbance | 11 | 2.26 ( 1.2 - 4.27 ) | 2.26 ( 6.7 ) | / | / | / | / |
| product issues | syringe issue | 566 | 203.66 ( 148.32 - 279.66 ) | 201.51 ( 7633 ) | device issue | 169 | 7.94 ( 6.71 - 9.4 ) | 7.85 ( 814.72 ) |
|  | needle issue | 512 | 34.29 ( 29.27 - 40.17 ) | 33.97 ( 4928.49 ) | / | / | / | / |
|  | device deployment issue | 161 | 214.29 ( 116.33 - 394.73 ) | 213.64 ( 2179.68 ) | / | / | / | / |
| musculoskeletal and connective tissue disorders |  | / | / | / | myalgia | 50 | 2.14 ( 1.61 - 2.85 ) | 2.14 ( 28.37 ) |
|  |  | / | / | / | neck pain | 15 | 2.27 ( 1.35 - 3.84 ) | 2.27 ( 9.99 ) |
| surgical and medical procedures | intestinal resection | 403 | 3.24 ( 2.91 - 3.61 ) | 3.23 ( 508.06 ) | surgery | 155 | 10.14 ( 8.46 - 12.15 ) | 10.03 ( 963.7 ) |
|  | surgery | 254 | 2.54 ( 2.22 - 2.9 ) | 2.53 ( 201.44 ) | intestinal resection | 71 | 4.55 ( 3.55 - 5.84 ) | 4.53 ( 171.62 ) |
|  | colectomy | 141 | 2.25 ( 1.88 - 2.69 ) | 2.25 ( 84.66 ) | colectomy | 62 | 7.29 ( 5.53 - 9.6 ) | 7.26 ( 273.44 ) |
|  | therapy cessation | 68 | 3.68 ( 2.82 - 4.8 ) | 3.68 ( 105.87 ) | hospitalisation | 46 | 2.33 ( 1.72 - 3.14 ) | 2.32 ( 32.38 ) |
|  | small intestinal resection | 54 | 2.39 ( 1.79 - 3.19 ) | 2.39 ( 37.48 ) | ileostomy | 40 | 4.83 ( 3.46 - 6.74 ) | 4.82 ( 105.5 ) |
|  | intestinal operation | 49 | 2.57 ( 1.89 - 3.48 ) | 2.56 ( 39.76 ) | ostomy bag placement | 32 | 22.6 ( 14.39 - 35.51 ) | 22.55 ( 388.71 ) |
|  | ileectomy | 22 | 3.28 ( 2.06 - 5.21 ) | 3.28 ( 28.43 ) | stoma creation | 24 | 8.29 ( 5.29 - 12.98 ) | 8.28 ( 122.34 ) |
|  | caesarean section | 22 | 2.05 ( 1.31 - 3.2 ) | 2.05 ( 10.31 ) | small intestinal resection | 23 | 6.91 ( 4.41 - 10.85 ) | 6.9 ( 95.75 ) |
|  | colectomy total | 20 | 3.95 ( 2.41 - 6.47 ) | 3.95 ( 34.62 ) | colostomy | 20 | 5.32 ( 3.31 - 8.54 ) | 5.31 ( 60.2 ) |
|  | proctectomy | 17 | 3.06 ( 1.82 - 5.17 ) | 3.06 ( 19.53 ) | intestinal operation | 19 | 4.47 ( 2.76 - 7.22 ) | 4.46 ( 44.89 ) |
|  | enterostomy | 16 | 3.2 ( 1.86 - 5.5 ) | 3.2 ( 19.84 ) | cholecystectomy | 16 | 4.29 ( 2.55 - 7.23 ) | 4.29 ( 35.62 ) |
|  | proctocolectomy | 16 | 4.03 ( 2.32 - 7.01 ) | 4.03 ( 28.53 ) | knee arthroplasty | 15 | 2.12 ( 1.25 - 3.57 ) | 2.11 ( 8.27 ) |
|  | self-medication | 15 | 219.01 ( 28.93 - 1658.09 ) | 218.95 ( 203.4 ) | transfusion | 13 | 14.54 ( 7.56 - 27.99 ) | 14.53 ( 113.11 ) |
|  | abdominal operation | 14 | 2.52 ( 1.43 - 4.45 ) | 2.52 ( 10.97 ) | spinal operation | 11 | 5.03 ( 2.66 - 9.49 ) | 5.02 ( 30.69 ) |
| skin and subcutaneous tissue disorders |  | / | / | / | hyperhidrosis | 30 | 2.13 ( 1.47 - 3.08 ) | 2.12 ( 16.75 ) |
|  |  | / | / | / | rash papular | 12 | 3.44 ( 1.9 - 6.25 ) | 3.44 ( 18.8 ) |
|  |  | / | / | / | / | / | / | / |
|  |  | / | / | / | / | / | / | / |
|  |  | / | / | / | / | / | / | / |
|  |  | / | / | / | / | / | / | / |
| investigations | liver function test increased | 28 | 2.15 ( 1.45 - 3.2 ) | 2.15 ( 15.04 ) | sars-cov-2 test positive | 22 | 2.6 ( 1.68 - 4.01 ) | 2.59 ( 19.95 ) |
|  | liver function test abnormal | 22 | 3 ( 1.9 - 4.75 ) | 3 ( 24.35 ) | blood potassium decreased | 16 | 3.26 ( 1.95 - 5.46 ) | 3.26 ( 22.81 ) |
|  | general physical condition abnormal | 11 | 2.26 ( 1.2 - 4.27 ) | 2.26 ( 6.7 ) | alanine aminotransferase increased | 12 | 2.95 ( 1.63 - 5.33 ) | 2.95 ( 14.15 ) |
|  | / | / | / | / | full blood count decreased | 12 | 14.97 ( 7.55 - 29.68 ) | 14.96 ( 106.97 ) |
| respiratory, thoracic and mediastinal disorders | interstitial lung disease | 17 | 2.36 ( 1.42 - 3.95 ) | 2.36 ( 11.51 ) | pulmonary embolism | 17 | 2.46 ( 1.5 - 4.03 ) | 2.46 ( 13.7 ) |
|  | pharyngeal swelling | 16 | 2.43 ( 1.43 - 4.13 ) | 2.43 ( 11.57 ) | pulmonary thrombosis | 16 | 13.66 ( 7.62 - 24.51 ) | 13.65 ( 131.99 ) |
|  | pneumonitis | 15 | 2.15 ( 1.25 - 3.69 ) | 2.15 ( 8.01 ) | throat tightness | 11 | 2.23 ( 1.21 - 4.11 ) | 2.23 ( 6.97 ) |
| neoplasms benign, malignant and unspecified (incl cysts and polyps) | breast cancer | 55 | 2.37 ( 1.78 - 3.15 ) | 2.37 ( 37.42 ) | neoplasm malignant | 18 | 2.36 ( 1.46 - 3.82 ) | 2.36 ( 13.19 ) |
|  | squamous cell carcinoma | 35 | 2.16 ( 1.51 - 3.08 ) | 2.16 ( 18.9 ) | / | / | / | / |
|  | pancreatic carcinoma | 13 | 3.11 ( 1.71 - 5.66 ) | 3.11 ( 15.35 ) | / | / | / | / |
|  | hepatic cancer | 11 | 2.03 ( 1.08 - 3.82 ) | 2.03 ( 5.06 ) | / | / | / | / |
| psychiatric disorders | mood swings | 15 | 2.33 ( 1.35 - 4.02 ) | 2.33 ( 9.81 ) | insomnia | 72 | 2.31 ( 1.82 - 2.94 ) | 2.31 ( 49.86 ) |
| vascular disorders | / | / | / | / | hypotension | 34 | 2.19 ( 1.54 - 3.09 ) | 2.18 ( 20.43 ) |
|  | / | / | / | / | thrombosis | 19 | 2.1 ( 1.32 - 3.35 ) | 2.1 ( 10.32 ) |
| eye disorders |  | / | / | / | / | / | / |  |
| metabolism and nutrition disorders |  | / | / | / | dehydration | 68 | 2.79 ( 2.18 - 3.58 ) | 2.78 ( 71.69 ) |
|  |  | / | / | / | hypophagia | 19 | 3.65 ( 2.27 - 5.86 ) | 3.64 ( 32.79 ) |
| renal and urinary disorders |  | / | / | / | renal failure | 19 | 3.88 ( 2.41 - 6.24 ) | 3.87 ( 36.19 ) |
|  |  | / | / | / | dysuria | 11 | 2.48 ( 1.34 - 4.57 ) | 2.48 ( 9 ) |
| hepatobiliary disorders | cholelithiasis | 75 | 2.09 ( 1.64 - 2.67 ) | 2.09 ( 37.48 ) | hepatic cirrhosis | 16 | 2.04 ( 1.23 - 3.37 ) | 2.03 ( 7.92 ) |
|  | cholecystitis | 16 | 2.62 ( 1.54 - 4.47 ) | 2.62 ( 13.63 ) | hepatic steatosis | 11 | 2.97 ( 1.6 - 5.51 ) | 2.97 ( 13.18 ) |
|  | hepatic function abnormal | 15 | 3.98 ( 2.25 - 7.05 ) | 3.98 ( 26.31 ) | / | / | / | / |
| cardiac disorders |  | / | / | / | myocardial infarction | 18 | 2.74 ( 1.69 - 4.44 ) | 2.74 ( 18.34 ) |
|  |  | / | / | / | cardiac failure congestive | 11 | 6.49 ( 3.4 - 12.4 ) | 6.48 ( 42.51 ) |
| immune system disorders | anaphylactic reaction | 76 | 2.48 ( 1.94 - 3.16 ) | 2.48 ( 57.22 ) | / | / | / | / |
|  | sarcoidosis | 10 | 4.56 ( 2.24 - 9.28 ) | 4.56 ( 21.19 ) | / | / | / | / |
| blood and lymphatic system disorders | thrombocytopenia | 21 | 2.03 ( 1.29 - 3.21 ) | 2.03 ( 9.64 ) | / | / | / | / |
| reproductive system and breast disorders | erectile dysfunction | 10 | 3.04 ( 1.54 - 6.01 ) | 3.04 ( 11.34 ) | / | / | / | / |
| pregnancy, puerperium and perinatal conditions | premature labour | 11 | 2.82 ( 1.48 - 5.37 ) | 2.82 ( 10.81 ) | / | / | / | / |
| ear and labyrinth disorders | / | / | / | / | hypoacusis | 10 | 2.62 ( 1.37 - 4.98 ) | 2.61 ( 9.23 ) |

Abbreviations: SOC, system organ class; PT, preferred term;PRR, Proportional Reporting Ratio ; ROR, Reporting Odds Ratio.

**Table S3 Negative SOC signal in patients of different genders.**

| gender | female | | | male | | |
| --- | --- | --- | --- | --- | --- | --- |
| drug | SOC | case number | ROR(95%Cl) | SOC | case number | ROR(95%Cl) |
| ustekinumab | gastrointestinal disorders | 5028 | 0.72 ( 0.69 - 0.74 ) | gastrointestinal disorders | 2805 | 0.66 ( 0.64 - 0.69 ) |
| general disorders and administration site conditions | 3870 | 0.68 ( 0.66 - 0.71 ) | general disorders and administration site conditions | 2040 | 0.66 ( 0.63 - 0.7 ) |
| musculoskeletal and connective tissue disorders | 1264 | 0.54 ( 0.51 - 0.57 ) | musculoskeletal and connective tissue disorders | 562 | 0.6 ( 0.55 - 0.66 ) |
| skin and subcutaneous tissue disorders | 1158 | 0.85 ( 0.8 - 0.9 ) | investigations | 544 | 0.42 ( 0.38 - 0.46 ) |
| investigations | 946 | 0.47 ( 0.44 - 0.5 ) | skin and subcutaneous tissue disorders | 466 | 0.86 ( 0.78 - 0.94 ) |
| respiratory, thoracic and mediastinal disorders | 758 | 0.75 ( 0.7 - 0.81 ) | respiratory, thoracic and mediastinal disorders | 383 | 0.79 ( 0.71 - 0.87 ) |
| psychiatric disorders | 475 | 0.62 ( 0.57 - 0.68 ) | neoplasms benign, malignant and unspecified (incl cysts and polyps) | 357 | 1.07 ( 0.96 - 1.19 ) |
| vascular disorders | 373 | 0.69 ( 0.62 - 0.77 ) | psychiatric disorders | 259 | 0.62 ( 0.55 - 0.71 ) |
| eye disorders | 277 | 0.64 ( 0.57 - 0.72 ) | vascular disorders | 189 | 0.56 ( 0.48 - 0.65 ) |
| metabolism and nutrition disorders | 262 | 0.49 ( 0.44 - 0.56 ) | renal and urinary disorders | 159 | 0.69 ( 0.59 - 0.81 ) |
| immune system disorders | 230 | 0.76 ( 0.66 - 0.86 ) | metabolism and nutrition disorders | 144 | 0.49 ( 0.42 - 0.58 ) |
| hepatobiliary disorders | 226 | 1.1 ( 0.96 - 1.26 ) | hepatobiliary disorders | 143 | 1.13 ( 0.95 - 1.34 ) |
| renal and urinary disorders | 213 | 0.74 ( 0.64 - 0.85 ) | eye disorders | 142 | 0.73 ( 0.62 - 0.87 ) |
| cardiac disorders | 187 | 0.68 ( 0.58 - 0.78 ) | cardiac disorders | 133 | 0.72 ( 0.61 - 0.86 ) |
| reproductive system and breast disorders | 150 | 0.62 ( 0.52 - 0.73 ) | blood and lymphatic system disorders | 99 | 0.79 ( 0.65 - 0.97 ) |
| pregnancy, puerperium and perinatal conditions | 143 | 0.67 ( 0.57 - 0.79 ) | immune system disorders | 84 | 0.76 ( 0.61 - 0.95 ) |
| blood and lymphatic system disorders | 137 | 0.69 ( 0.58 - 0.82 ) | reproductive system and breast disorders | 42 | 0.89 ( 0.65 - 1.22 ) |
| ear and labyrinth disorders | 78 | 0.71 ( 0.57 - 0.89 ) | social circumstances | 42 | 0.44 ( 0.32 - 0.6 ) |
| social circumstances | 76 | 0.54 ( 0.43 - 0.69 ) | ear and labyrinth disorders | 33 | 0.62 ( 0.43 - 0.88 ) |
| endocrine disorders | 37 | 0.76 ( 0.55 - 1.06 ) | congenital, familial and genetic disorders | 19 | 1.26 ( 0.78 - 2.01 ) |
| congenital, familial and genetic disorders | 29 | 1.26 ( 0.86 - 1.85 ) | endocrine disorders | 7 | 0.49 ( 0.23 - 1.04 ) |
| risanzumab | infections and infestations | 637 | 0.96 ( 0.88 - 1.04 ) | gastrointestinal disorders | 1007 | 1.04 ( 0.97 - 1.12 ) |
| musculoskeletal and connective tissue disorders | 452 | 0.77 ( 0.7 - 0.85 ) | infections and infestations | 370 | 0.99 ( 0.89 - 1.1 ) |
| injury, poisoning and procedural complications | 400 | 0.36 ( 0.33 - 0.4 ) | injury, poisoning and procedural complications | 256 | 0.32 ( 0.28 - 0.36 ) |
| skin and subcutaneous tissue disorders | 323 | 1.04 ( 0.93 - 1.17 ) | musculoskeletal and connective tissue disorders | 251 | 1.09 ( 0.95 - 1.24 ) |
| investigations | 320 | 0.63 ( 0.56 - 0.7 ) | investigations | 212 | 0.58 ( 0.5 - 0.66 ) |
| respiratory, thoracic and mediastinal disorders | 204 | 0.85 ( 0.74 - 0.98 ) | skin and subcutaneous tissue disorders | 141 | 1.07 ( 0.9 - 1.27 ) |
| psychiatric disorders | 135 | 0.79 ( 0.66 - 0.94 ) | respiratory, thoracic and mediastinal disorders | 128 | 1.01 ( 0.85 - 1.21 ) |
| vascular disorders | 115 | 0.93 ( 0.77 - 1.12 ) | vascular disorders | 72 | 0.8 ( 0.63 - 1.02 ) |
| cardiac disorders | 56 | 1.02 ( 0.78 - 1.33 ) | psychiatric disorders | 71 | 0.71 ( 0.56 - 0.9 ) |
| eye disorders | 55 | 0.55 ( 0.42 - 0.72 ) | cardiac disorders | 47 | 1.21 ( 0.9 - 1.62 ) |
| immune system disorders | 51 | 0.71 ( 0.54 - 0.94 ) | eye disorders | 33 | 0.63 ( 0.45 - 0.9 ) |
| reproductive system and breast disorders | 48 | 0.99 ( 0.74 - 1.33 ) | blood and lymphatic system disorders | 20 | 0.84 ( 0.54 - 1.32 ) |
| hepatobiliary disorders | 48 | 1.07 ( 0.8 - 1.43 ) | immune system disorders | 16 | 0.7 ( 0.42 - 1.15 ) |
| blood and lymphatic system disorders | 24 | 0.69 ( 0.46 - 1.03 ) | ear and labyrinth disorders | 12 | 0.8 ( 0.45 - 1.43 ) |
| social circumstances | 24 | 0.66 ( 0.44 - 0.99 ) | social circumstances | 11 | 0.35 ( 0.19 - 0.64 ) |
| pregnancy, puerperium and perinatal conditions | 13 | 0.41 ( 0.23 - 0.7 ) | reproductive system and breast disorders | 5 | 0.37 ( 0.15 - 0.9 ) |
| endocrine disorders | 12 | 1.34 ( 0.75 - 2.39 ) | congenital, familial and genetic disorders | 4 | 1.13 ( 0.41 - 3.1 ) |
| congenital, familial and genetic disorders | 2 | 0.41 ( 0.1 - 1.66 ) | / | / | / |

**Table S4 AEs in different gender groups.**

| gender | female | | | | male | | | |
| --- | --- | --- | --- | --- | --- | --- | --- | --- |
| drug | PT | case number | ROR(95%Cl) | PRR(χ2) | PT | case number | ROR(95%Cl) | PRR(χ2) |
| ustekinumab | pneumonia | 356 | 2.25 ( 2.01 - 2.52 ) | 2.24 ( 206.85 ) | pneumonia | 195 | 2.43 ( 2.09 - 2.84 ) | 2.42 ( 136.94 ) |
| lower respiratory tract infection | 336 | 8.1 ( 7.05 - 9.31 ) | 8.03 ( 1243.79 ) | intestinal resection | 149 | 2.57 ( 2.15 - 3.07 ) | 2.56 ( 118.11 ) |
| infusion related reaction | 309 | 2.5 ( 2.21 - 2.83 ) | 2.48 ( 228.13 ) | lower respiratory tract infection | 141 | 9.85 ( 7.9 - 12.27 ) | 9.78 ( 628.22 ) |
| exposure during pregnancy | 287 | 3.12 ( 2.74 - 3.55 ) | 3.1 ( 325.93 ) | infusion related reaction | 138 | 3.09 ( 2.56 - 3.72 ) | 3.07 ( 155.69 ) |
| accidental exposure to product | 239 | 40.34 ( 30.99 - 52.52 ) | 40.05 ( 2108.34 ) | accidental exposure to product | 130 | 46.15 ( 31.89 - 66.77 ) | 45.82 ( 1236.74 ) |
| intestinal resection | 228 | 3.06 ( 2.64 - 3.54 ) | 3.04 ( 250.43 ) | abscess | 121 | 2.12 ( 1.74 - 2.57 ) | 2.11 ( 60.7 ) |
| abscess | 157 | 2.27 ( 1.91 - 2.69 ) | 2.26 ( 93.43 ) | surgery | 102 | 2.33 ( 1.89 - 2.88 ) | 2.32 ( 65.16 ) |
| therapeutic response decreased | 149 | 6.64 ( 5.43 - 8.11 ) | 6.61 ( 458.76 ) | therapeutic response decreased | 98 | 6.9 ( 5.4 - 8.83 ) | 6.87 ( 319.2 ) |
| clostridium difficile infection | 148 | 2.25 ( 1.89 - 2.69 ) | 2.25 ( 86.72 ) | clostridium difficile infection | 93 | 2.65 ( 2.12 - 3.32 ) | 2.65 ( 78.94 ) |
| kidney infection | 104 | 4.26 ( 3.41 - 5.33 ) | 4.25 ( 191.54 ) | anal abscess | 92 | 2.34 ( 1.87 - 2.93 ) | 2.33 ( 59.42 ) |
| cellulitis | 88 | 2.67 ( 2.12 - 3.36 ) | 2.66 ( 74.84 ) | cellulitis | 46 | 2.52 ( 1.84 - 3.46 ) | 2.52 ( 35.09 ) |
| anal abscess | 87 | 2.07 ( 1.65 - 2.6 ) | 2.07 ( 40.93 ) | abdominal abscess | 41 | 2.41 ( 1.73 - 3.37 ) | 2.41 ( 28.41 ) |
| flushing | 56 | 2.06 ( 1.55 - 2.74 ) | 2.06 ( 26.11 ) | postoperative wound infection | 35 | 3.47 ( 2.39 - 5.05 ) | 3.47 ( 48.34 ) |
| breast cancer | 52 | 2.24 ( 1.67 - 3.02 ) | 2.24 ( 30.15 ) | rectal abscess | 33 | 2.48 ( 1.71 - 3.6 ) | 2.48 ( 24.35 ) |
| tooth abscess | 50 | 4.61 ( 3.33 - 6.39 ) | 4.61 ( 102.18 ) | post procedural infection | 32 | 2.18 ( 1.5 - 3.18 ) | 2.18 ( 17.51 ) |
| cholelithiasis | 47 | 2.13 ( 1.56 - 2.91 ) | 2.13 ( 24.02 ) | localised infection | 27 | 2.09 ( 1.39 - 3.14 ) | 2.09 ( 13.17 ) |
| anaphylactic reaction | 47 | 2.27 ( 1.66 - 3.1 ) | 2.27 ( 28.08 ) | tooth abscess | 27 | 4.63 ( 2.98 - 7.2 ) | 4.63 ( 56.31 ) |
| respiratory tract infection | 47 | 4.54 ( 3.25 - 6.35 ) | 4.54 ( 94.21 ) | staphylococcal infection | 27 | 2.05 ( 1.37 - 3.08 ) | 2.05 ( 12.53 ) |
| rectal abscess | 45 | 2.82 ( 2.04 - 3.9 ) | 2.81 ( 42.67 ) | foetal exposure during pregnancy | 26 | 2.58 ( 1.69 - 3.93 ) | 2.58 ( 20.87 ) |
| abdominal abscess | 45 | 2.25 ( 1.63 - 3.09 ) | 2.24 ( 26.17 ) | kidney infection | 22 | 3.83 ( 2.38 - 6.17 ) | 3.82 ( 35.26 ) |
| risankizumab | intestinal obstruction | 128 | 3.67 ( 3.04 - 4.43 ) | 3.63 ( 212.25 ) | fatigue | 130 | 2.11 ( 1.76 - 2.53 ) | 2.08 ( 66.96 ) |
| surgery | 98 | 9.21 ( 7.29 - 11.65 ) | 9.11 ( 511.4 ) | intestinal obstruction | 92 | 2.65 ( 2.13 - 3.3 ) | 2.62 ( 82.38 ) |
| injection site haemorrhage | 59 | 5.77 ( 4.34 - 7.67 ) | 5.73 ( 185.75 ) | headache | 64 | 2.14 ( 1.65 - 2.77 ) | 2.12 ( 34.69 ) |
| urinary tract infection | 56 | 2.13 ( 1.62 - 2.81 ) | 2.13 ( 30.73 ) | surgery | 52 | 5.54 ( 4.08 - 7.53 ) | 5.49 ( 151.29 ) |
| intestinal resection | 49 | 5.26 ( 3.86 - 7.18 ) | 5.23 ( 137.58 ) | dizziness | 50 | 2.52 ( 1.88 - 3.39 ) | 2.51 ( 40.52 ) |
| dehydration | 48 | 2.99 ( 2.22 - 4.05 ) | 2.98 ( 56.27 ) | injection site haemorrhage | 48 | 4.53 ( 3.31 - 6.2 ) | 4.49 ( 107.43 ) |
| insomnia | 46 | 2.11 ( 1.56 - 2.86 ) | 2.1 ( 24.56 ) | feeling abnormal | 28 | 2.61 ( 1.76 - 3.87 ) | 2.6 ( 24.52 ) |
| feeling abnormal | 45 | 2.71 ( 1.99 - 3.7 ) | 2.7 ( 43.43 ) | colectomy | 28 | 7.28 ( 4.73 - 11.21 ) | 7.24 ( 111.72 ) |
| flatulence | 36 | 2.61 ( 1.85 - 3.68 ) | 2.6 ( 31.96 ) | fall | 28 | 2 ( 1.36 - 2.96 ) | 2 ( 12.77 ) |
| colectomy | 34 | 5.48 ( 3.77 - 7.96 ) | 5.46 ( 100.7 ) | flatulence | 28 | 2.22 ( 1.5 - 3.28 ) | 2.21 ( 16.84 ) |
| small intestinal obstruction | 34 | 3.55 ( 2.47 - 5.09 ) | 3.54 ( 53.86 ) | gastrointestinal sounds abnormal | 27 | 5.97 ( 3.89 - 9.17 ) | 5.94 ( 86.35 ) |
| gastrointestinal sounds abnormal | 33 | 7.9 ( 5.32 - 11.72 ) | 7.87 ( 148.51 ) | insomnia | 26 | 2.42 ( 1.61 - 3.64 ) | 2.41 ( 19.31 ) |
| loss of consciousness | 32 | 4.14 ( 2.84 - 6.03 ) | 4.13 ( 64.64 ) | injection site papule | 22 | 11.15 ( 6.64 - 18.74 ) | 11.1 ( 131.71 ) |
| nephrolithiasis | 32 | 2.74 ( 1.9 - 3.96 ) | 2.74 ( 31.67 ) | sepsis | 22 | 3.02 ( 1.93 - 4.74 ) | 3.01 ( 25.9 ) |
| injection site erythema | 29 | 2.23 ( 1.53 - 3.27 ) | 2.23 ( 18.01 ) | loss of consciousness | 21 | 2.95 ( 1.86 - 4.66 ) | 2.94 ( 23.52 ) |
| myalgia | 28 | 2.08 ( 1.41 - 3.07 ) | 2.08 ( 14.43 ) | intestinal resection | 21 | 2.87 ( 1.82 - 4.53 ) | 2.86 ( 22.34 ) |
| chills | 27 | 2.4 ( 1.62 - 3.57 ) | 2.4 ( 19.97 ) | cerebrovascular accident | 21 | 3.79 ( 2.38 - 6.04 ) | 3.78 ( 36.33 ) |
| ileostomy | 26 | 4.08 ( 2.69 - 6.18 ) | 4.06 ( 51.31 ) | peripheral swelling | 19 | 2.56 ( 1.59 - 4.13 ) | 2.55 ( 16.01 ) |
| upper respiratory tract infection | 25 | 4.35 ( 2.84 - 6.67 ) | 4.34 ( 54.32 ) | myalgia | 17 | 2.32 ( 1.4 - 3.83 ) | 2.31 ( 11.43 ) |
| obstruction | 23 | 4.86 ( 3.1 - 7.62 ) | 4.85 ( 58.32 ) | injection site erythema | 17 | 3.33 ( 1.99 - 5.56 ) | 3.32 ( 23.76 ) |
| hernia | 23 | 2.85 ( 1.85 - 4.39 ) | 2.84 ( 24.55 ) | hypoaesthesia | 17 | 2.5 ( 1.51 - 4.14 ) | 2.49 ( 13.61 ) |
| injection site swelling | 21 | 2.81 ( 1.78 - 4.41 ) | 2.8 ( 21.76 ) | clostridium difficile infection | 16 | 2.18 ( 1.3 - 3.66 ) | 2.18 ( 9.24 ) |
| hypotension | 20 | 2.78 ( 1.75 - 4.42 ) | 2.78 ( 20.37 ) | ileostomy | 14 | 4.33 ( 2.43 - 7.72 ) | 4.32 ( 29.61 ) |
| hyperhidrosis | 18 | 2.52 ( 1.55 - 4.1 ) | 2.51 ( 14.85 ) | hepatic enzyme increased | 14 | 3.92 ( 2.21 - 6.95 ) | 3.91 ( 25.57 ) |
| injection site pruritus | 18 | 2.07 ( 1.28 - 3.35 ) | 2.06 ( 9.08 ) | gastrointestinal haemorrhage | 13 | 6.27 ( 3.37 - 11.67 ) | 6.26 ( 44.1 ) |
| seizure | 18 | 3.7 ( 2.25 - 6.09 ) | 3.7 ( 30.62 ) | hypotension | 13 | 2.32 ( 1.31 - 4.12 ) | 2.32 ( 8.78 ) |
| injection site papule | 17 | 5.29 ( 3.13 - 8.96 ) | 5.28 ( 48.23 ) | joint swelling | 13 | 2.93 ( 1.64 - 5.24 ) | 2.92 ( 14.44 ) |
